# Supplementary material
Source: PubMed Central journal article supplement (PMC8582225)

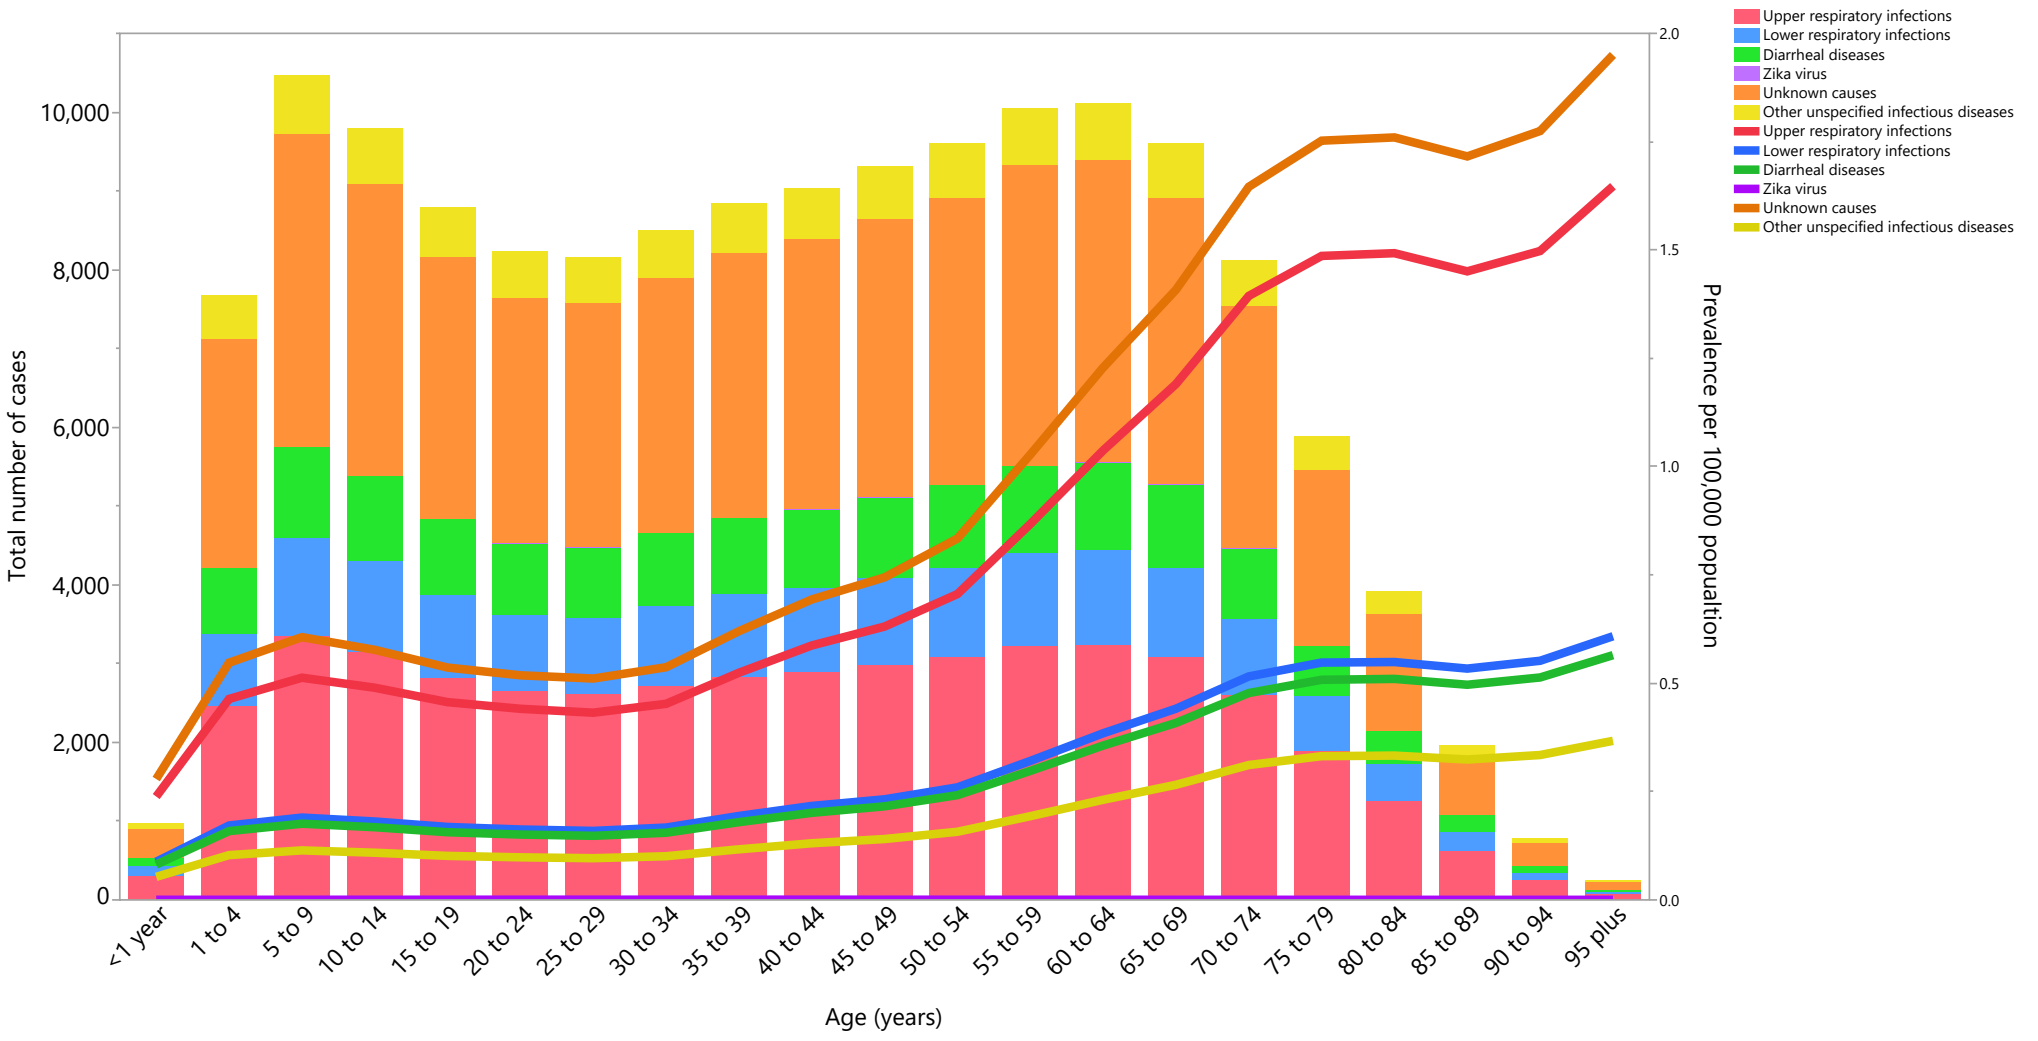

Supplement: 12974_2021_2319_MOESM12_ESM.pdf [file 12974_2021_2319_MOESM12_ESM.pdf]
